# Supplementary material for: Self-assembly and decay of Mn(ii) pivalate–phosphonate complexes
Source: Royal Society of Chemistry journal article supplement (doi:10.1039/c3nj00899a), 2014-01-01
Supplement: c3nj00899a1.pdf [file c3nj00899a1.pdf]

*Electronic Supplementary Information (ESI) for the paper*

**Self-assembly and decay of Mn(II) pivalate-phosphonate complexes**

Nataliya Burkovskaya, Grigory Aleksandrov, Elena Ugolkova, Nikolay Efimov, Igor Evstifeev, Mikhail Kiskin, Zhanna Dobrohotova, Vadim Minin, Igor Eremenko

**Table S1.** Crystal data and structure refinement statistics for manganese(II) compounds.

| Parameter                                                           | <b>1</b>                                                                                         | <b>2·2C<sub>7</sub>H<sub>16</sub>·2MeOH</b>                                                        | <b>3</b>                                                                        | <b>3a</b>                                                                       |
|---------------------------------------------------------------------|--------------------------------------------------------------------------------------------------|----------------------------------------------------------------------------------------------------|---------------------------------------------------------------------------------|---------------------------------------------------------------------------------|
| CSD number                                                          | 951019                                                                                           | 951020                                                                                             | 975925                                                                          | 982652                                                                          |
| Empirical formula                                                   | C <sub>96</sub> H <sub>188</sub> Cl <sub>4</sub> Mn <sub>10</sub> O <sub>44</sub> P <sub>4</sub> | C <sub>164</sub> H <sub>354</sub> Cl <sub>2</sub> Mn <sub>20</sub> O <sub>88</sub> P <sub>12</sub> | C <sub>76</sub> H <sub>156</sub> Mn <sub>4</sub> O <sub>36</sub> P <sub>4</sub> | C <sub>76</sub> H <sub>156</sub> Mn <sub>4</sub> O <sub>36</sub> P <sub>4</sub> |
| Molecular mass                                                      | 2861.53                                                                                          | 5275.79                                                                                            | 1989.64                                                                         | 1989.64                                                                         |
| <i>T</i> /K                                                         | 150(2)                                                                                           | 173(2)                                                                                             | 184(2)                                                                          | 120(2)                                                                          |
| Space group                                                         | Tetragonal,<br><i>I</i> -42 <i>m</i>                                                             | Triclinic,<br><i>P</i> -1                                                                          | Monoclinic,<br><i>C</i> 2/ <i>c</i>                                             | Trigonal,<br><i>P</i> -3                                                        |
| <i>Z</i>                                                            | 2                                                                                                | 1                                                                                                  | 4                                                                               | 2                                                                               |
| <i>a</i> /Å                                                         | 22.4667(10)                                                                                      | 20.016(1)                                                                                          | 27.413(17)                                                                      | 16.2519(15)                                                                     |
| <i>b</i> /Å                                                         | 22.4667(10)                                                                                      | 20.421(1)                                                                                          | 17.073(11)                                                                      | 16.2519(15)                                                                     |
| <i>c</i> /Å                                                         | 14.6274(7)                                                                                       | 20.656(1)                                                                                          | 26.290(16)                                                                      | 25.431(5)                                                                       |
| $\alpha$ /°                                                         | 90.00                                                                                            | 86.268(7)                                                                                          | 90.00                                                                           | 90                                                                              |
| $\beta$ /°                                                          | 90.00                                                                                            | 68.581(7)                                                                                          | 108.213(10)                                                                     | 90                                                                              |
| $\gamma$ /°                                                         | 90.00                                                                                            | 62.388(7)                                                                                          | 90.00                                                                           | 120                                                                             |
| <i>V</i> /Å <sup>3</sup>                                            | 7383.2(7)                                                                                        | 6909.1(6)                                                                                          | 11688(13)                                                                       | 5817.0(15)                                                                      |
| <i>d</i> <sub>calc</sub> /g·cm <sup>-3</sup>                        | 1.287                                                                                            | 1.268                                                                                              | 1.131                                                                           | 1.160                                                                           |
| $\mu$ /mm <sup>-1</sup>                                             | 1.008                                                                                            | 1.037                                                                                              | 0.543                                                                           | 0.548                                                                           |
| $\theta$ /° scanning range                                          | 1.28–31.18                                                                                       | 2.14–28.70                                                                                         | 1.43–26.02                                                                      | 0.80–27.48                                                                      |
| Reflections measured                                                | 47010                                                                                            | 73931                                                                                              | 41298                                                                           | 47336                                                                           |
| Independent reflections                                             | 6132                                                                                             | 35351                                                                                              | 11482                                                                           | 8921                                                                            |
| Reflections with <i>I</i> >2 $\sigma$ <sub><i>I</i></sub>           | 5609                                                                                             | 21024                                                                                              | 4132                                                                            | 3948                                                                            |
| <i>R</i> <sub>int</sub>                                             | 0.0441                                                                                           | 0.0412                                                                                             | 0.1125                                                                          | 0.1169                                                                          |
| Number of refined parameters                                        | 199                                                                                              | 1434                                                                                               | 1012                                                                            | 687                                                                             |
| <i>T</i> <sub>min</sub> / <i>T</i> <sub>max</sub>                   | 0.707/0.924                                                                                      | 0.713/0.886                                                                                        | 0.909/0.958                                                                     | 0.875/0.942                                                                     |
| <i>Goof</i>                                                         | 1.086                                                                                            | 1.011                                                                                              | 1.401                                                                           | 1.321                                                                           |
| <i>R</i> <sub>1</sub> ( <i>I</i> >2 $\sigma$ <sub><i>I</i></sub> )  | 0.0264                                                                                           | 0.0619                                                                                             | 0.1148                                                                          | 0.0842                                                                          |
| <i>wR</i> <sub>2</sub> ( <i>I</i> >2 $\sigma$ <sub><i>I</i></sub> ) | 0.0712                                                                                           | 0.1631                                                                                             | 0.2744                                                                          | 0.2364                                                                          |
| <i>R</i> <sub>1</sub> (all data)                                    | 0.0350                                                                                           | 0.1210                                                                                             | 0.2036                                                                          | 0.1827                                                                          |
| <i>wR</i> <sub>2</sub> (all data)                                   | 0.0851                                                                                           | 0.2075                                                                                             | 0.2985                                                                          | 0.2927                                                                          |
| Flack parameter                                                     | 0.005(5)                                                                                         |                                                                                                    |                                                                                 |                                                                                 |

**Table S2.** Selected bond lengths [Å], bond angles [deg] and H-bonds parameters in manganese compounds.

| Parameter                              | <b>1*</b>                | <b>2·2C<sub>7</sub>H<sub>16</sub>·2MeOH**</b> | <b>3***</b>             | <b>3a****</b>           |
|----------------------------------------|--------------------------|-----------------------------------------------|-------------------------|-------------------------|
| Mn–O( $\mu$ -OH)                       | –                        | 2.210(3), 2.135(3)                            | –                       |                         |
| Mn–Cl( $\mu$ -Cl)                      | 2.4721(6)                | 2.5301(12), 2.5404(12)                        | –                       |                         |
| Mn–O( $\mu$ -Piv)                      | 2.133(3)–2.224(2)        | 2.055(3)–2.281(3)                             | –                       |                         |
| Mn–O(O <sub>3</sub> PBu <sup>t</sup> ) | 2.110(2)–2.292(2)        | 2.047(3)–2.500(3)                             | 2.109(11)–<br>2.169(9)  | 2.077(10)–<br>2.165(5)  |
| Mn–O(HPiv)                             | 2.292(2)                 | 2.208(5)–2.327(7)                             | 2.272(12)–<br>2.356(13) | 2.221(7)–<br>2.386(15)  |
| Mn–O(H <sub>2</sub> O)                 | –                        | 2.094(3)–2.375(2)                             | –                       |                         |
| P–O                                    | 1.534(2)–1.539(2)        | 1.506(3)–1.551(3)                             | 1.472(11)–<br>1.550(11) | 1.404(11)–<br>1.620(11) |
| O–P–O                                  | 104.28(12)–<br>112.74(8) | 103.5(2)–114.6(2)                             | 108.3(6)–<br>113.6(7)   | 105.0(6)–<br>116.5(7)   |
| C–O(Piv)                               | 1.240(4)–1.286(4)        | 1.239(6)–1.278(5)                             | –                       |                         |
| C–O(HPiv)                              | 1.213(4), 1.319(5)       | 1.209(6)–1.323(8)                             | 1.153(9)–<br>1.261(9)   | 1.162(7)–<br>1.285(8)   |
| O–C–O                                  | 122.6(3)–123.9(3)        | 122.8(4)–126.6(4)                             | 125.0(11)–<br>133.7(12) | 122.5(13)–<br>128.8(12) |
| <b>H-bonds</b>                         |                          |                                               |                         |                         |
| O...O                                  | 2.603                    | 2.552–2.613                                   | 2.505–2.621             | 2.536–2.591             |
| H...O                                  | 1.78                     | 1.72–1.78                                     | 1.67–1.80               | 1.72–1.75               |
| O–H–O                                  | 166.0                    | 170.2–173.0                                   | 167.0–173.8             | 163.0–174.6             |

\* Symmetry codes: (i)  $x, -y+1, -z+1$ ; (ii)  $-x+1, -y+1, z$ ; (iii)  $-x+1, -y+1, z$ ; (iv)  $y, x, z$ ; (v)  $x, -y+1, -z+1$ ; (vi)  $-x+1, y, -z+1$ ; (vii)  $-x+1, y, -z+1$ ;

\*\* Symmetry code: (i)  $-x+2, -y+1, -z+1$ .

\*\*\* Symmetry code: (i)  $-x, y, -z+1/2$ ;

\*\*\*\* Symmetry code: (i)  $-y+1, x-y, z$ ; (ii)  $-x+y+1, -x+1, z$

**Table S3.** Mass spectrum of 1·2H<sub>2</sub>O under TGA experiment conditions.

| <i>m/z</i> | Ion                                                               | <i>I</i> /% | <i>m/z</i> | Ion                                                                                                                 | <i>I</i> /% |
|------------|-------------------------------------------------------------------|-------------|------------|---------------------------------------------------------------------------------------------------------------------|-------------|
| 12         | [C] <sup>+</sup>                                                  | 3.9         | 39         | [C <sub>3</sub> H <sub>3</sub> ] <sup>+</sup>                                                                       | 37.4        |
| 15         | [CH <sub>3</sub> ] <sup>+</sup>                                   | 0.4         | 41         | [C <sub>3</sub> H <sub>5</sub> ] <sup>+</sup> , [C <sub>2</sub> HO] <sup>+</sup>                                    | 11.3        |
| 17         | [OH] <sup>+</sup>                                                 | 15.8        | 43         | [C <sub>3</sub> H <sub>7</sub> ] <sup>+</sup>                                                                       | 3.3         |
| 18         | [H <sub>2</sub> O] <sup>+</sup>                                   | 59.1        | 44         | [CO <sub>2</sub> ] <sup>+</sup> , [C <sub>3</sub> H <sub>8</sub> ] <sup>+</sup>                                     | 33.5        |
| 27         | [C <sub>2</sub> H <sub>3</sub> ] <sup>+</sup>                     | 5.9         | 45         | [COOH] <sup>+</sup> , [C <sub>2</sub> H <sub>5</sub> O] <sup>+</sup> [ <sup>13</sup> CO <sub>2</sub> ] <sup>+</sup> | 0.7         |
| 28         | [C <sub>2</sub> H <sub>4</sub> ] <sup>+</sup> , [CO] <sup>+</sup> | 28.6        | 56         | [C <sub>4</sub> H <sub>8</sub> ] <sup>+</sup>                                                                       | 3.1         |
| 29         | [C <sub>2</sub> H <sub>5</sub> ] <sup>+</sup>                     | 8.4         | 57         | [CCOOH] <sup>+</sup> [C <sub>4</sub> H <sub>9</sub> ] <sup>+</sup>                                                  | 0.5         |
| 31         | [C <sub>2</sub> H <sub>7</sub> ] <sup>+</sup>                     | 0.4         | 58         | [HCCOOH] <sup>+</sup>                                                                                               | 2.7         |
| 35         | [ <sup>35</sup> Cl] <sup>+</sup>                                  | 0.2         | 59         | [H <sub>2</sub> CCOOH] <sup>+</sup>                                                                                 | 3.2         |
| 36         | [H <sup>35</sup> Cl] <sup>+</sup>                                 | 100         | 87         | [C <sub>3</sub> H <sub>7</sub> COOH] <sup>+</sup>                                                                   | 0.5         |
| 38         | [H <sup>37</sup> Cl] <sup>+</sup>                                 | 22.2        | -          | -                                                                                                                   | -           |

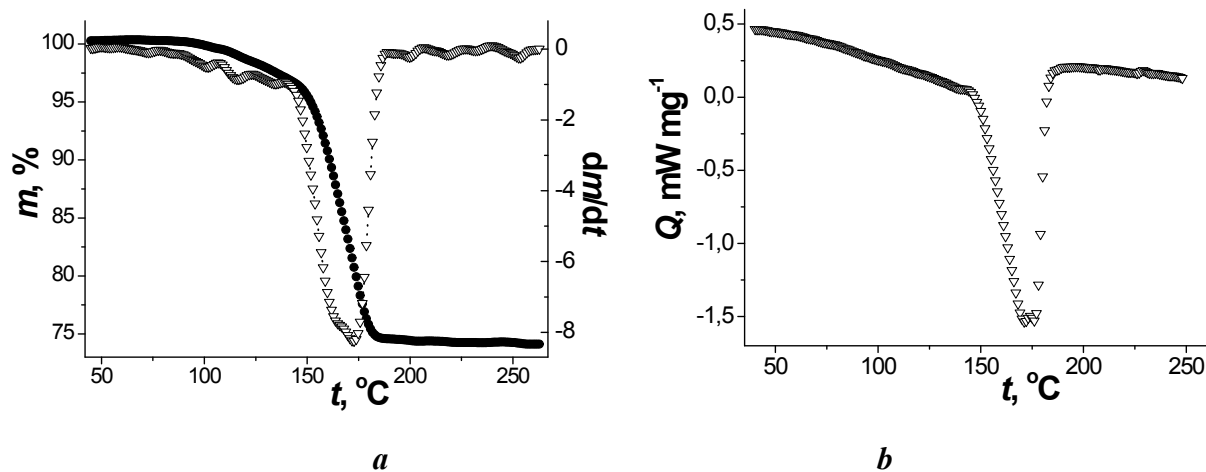

**Fig. S1.** Plots of mass change, first derivative of mass (*a*), and thermal flux *versus* temperature (*b*) for **1**.

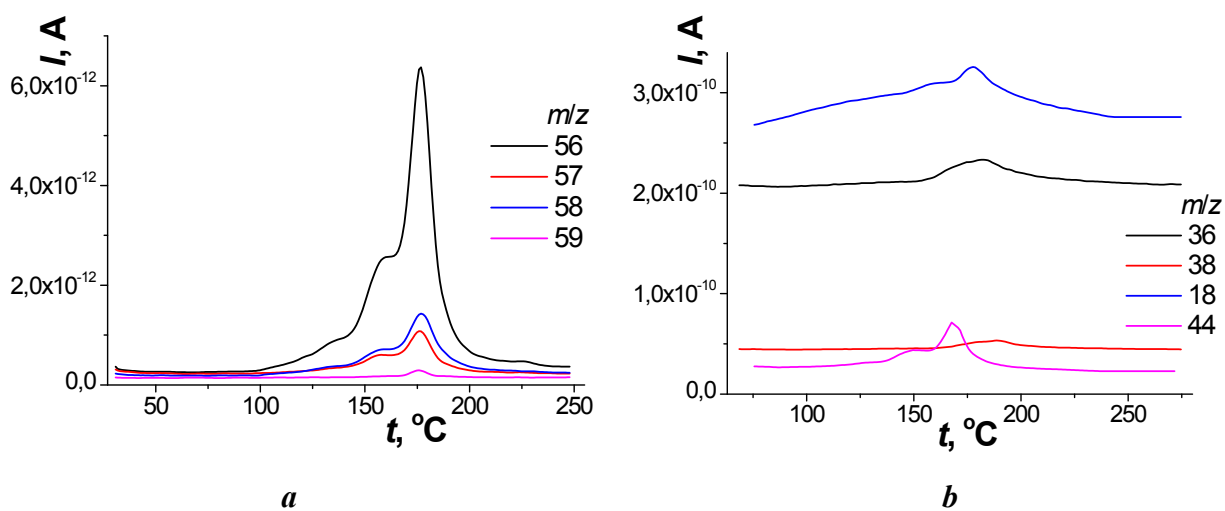

**Fig. S2.** Fragments of the mass spectrum (*a* and *b*) of **1** under the conditions of the TGA experiment.

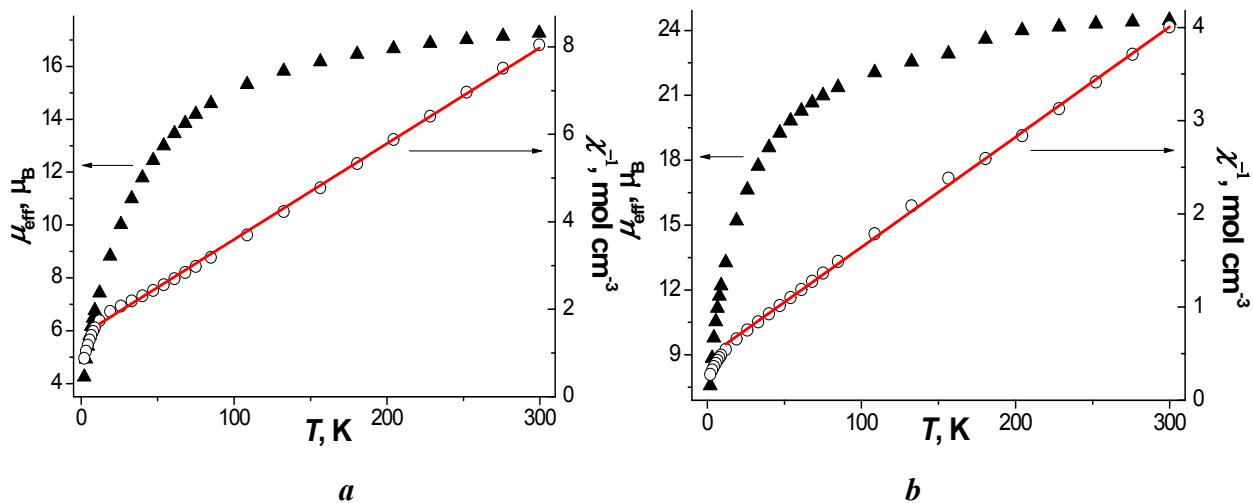

**Fig. S3.** Magnetic properties of **1** (a) and **2** (b):  $\mu_{\text{eff}}(T)$  ( $\blacktriangle$ ) and  $1/\chi(T)$  ( $\circ$ ) plots; calculated data (see main text) are shown as lines.

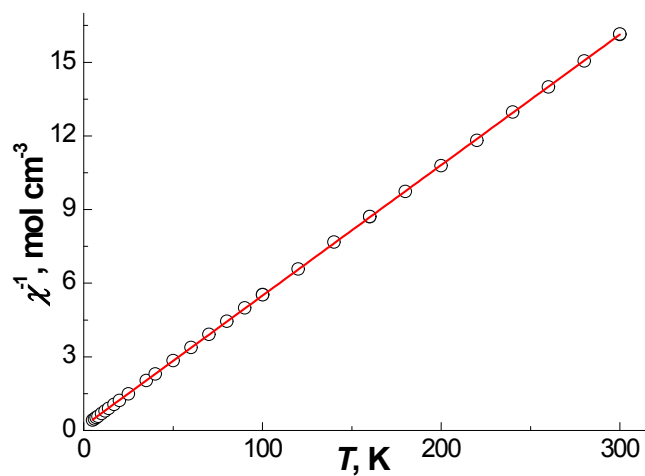

**Fig. S4.**  $1/\chi(T)$  ( $\circ$ ) plot and calculated data (line, see main text) for **3**·8H<sub>2</sub>O.

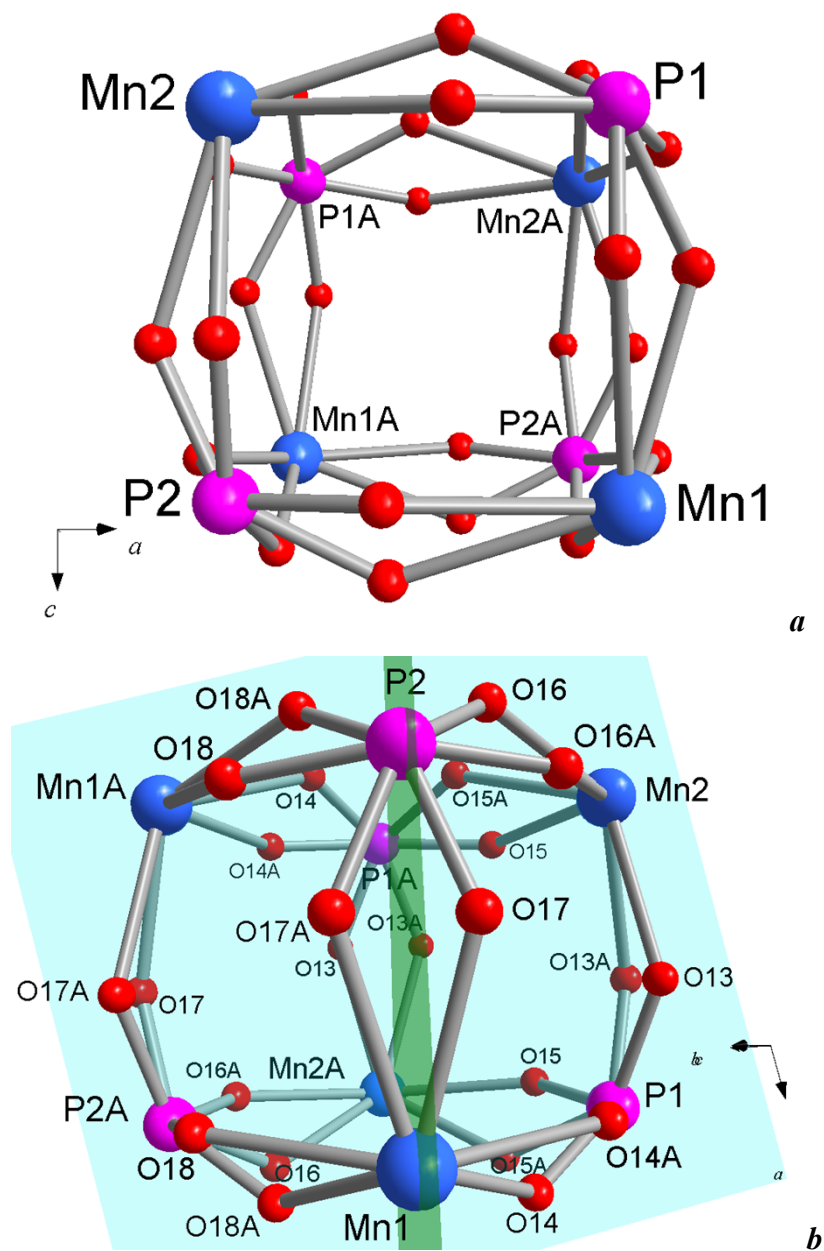

**Fig. S5.** Disorder of the  $O_3P$  fragments in the structure **3** (Piv anions and  $t$ Bu-groups at P atoms are omitted). *b* - Two groups of O atoms (without index and with index “A”) correspond to different isomers. Blue and green planes correspond two “non-crystallography” *m*-planes passing through Mn1, Mn2A, P1A, P2 and Mn1A, Mn2, P1, P2A atoms.
